# Supplementary material for: Vibrational and electronic spectra of protonated vanillin: exploring protonation sites and isomerisation
Source: Royal Society of Chemistry journal article supplement (doi:10.1039/d3cp05573f), 2024-01-01
Supplement: d3cp05573f1.pdf [file d3cp05573f1.pdf]

## Vibrational and electronic spectra of protonated vanillin: Exploring protonation sites and isomerization

Alejandro Gutiérrez-Quintanilla<sup>a,b</sup>, Baptiste Moge<sup>c</sup>, Isabelle Compagnon<sup>c</sup>, and Jennifer A. Noble<sup>\*a</sup>

<sup>a</sup>Physique des Interactions Ioniques et Moléculaires (PIIM): CNRS, Aix-Marseille Université, Marseille, France; Email: [jennifer.noble@univ-amu.fr](mailto:jennifer.noble@univ-amu.fr)

<sup>b</sup>Université de Pau et des Pays de l'Adour, E2S UPPA, CNRS, IPREM, Pau, France

<sup>c</sup>Univ. Lyon, Université Claude Bernard Lyon 1, CNRS, Institut Lumière Matière, F-69622 Villeurbanne, France.

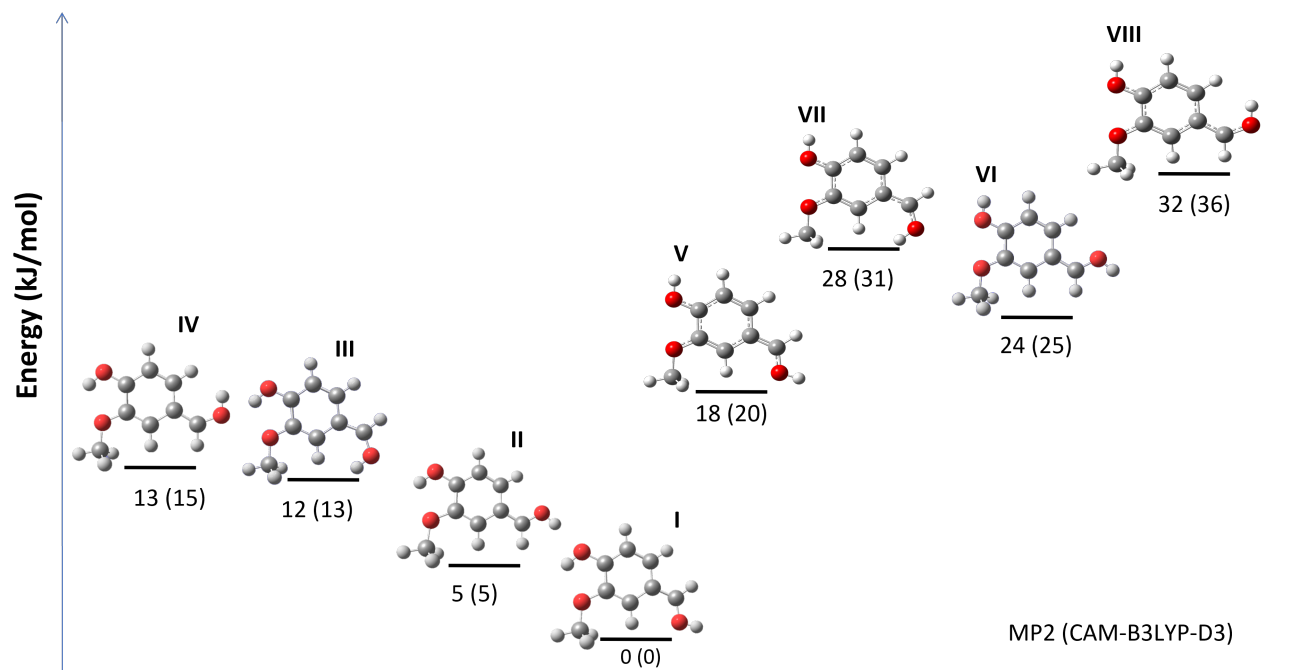

Figure S.1 Relative theoretical energies (kJ/mol) in the ground electronic state for the different vanillin isomers protonated on the carbonyl oxygen ( $O_{1'}$ ) w.r.t. the lowest energy one. Values determined at MP2 and CAM-B3LYP (in parentheses) levels with an aug-cc-pVDZ basis set. The numbering of isomers is based on their relative energies w.r.t. the lowest energy isomer. They are also grouped into two sets: (left) with or (right) without an intramolecular hydrogen bond, to see the influence of such interaction on the relative energies. The other two oxygen protonated species are not shown because the hydroxyl group protonated specie is quite less stable than isomer I (CAM-B3LYP 142 kJ/mol) and the other isomers shown, and the methoxy protonated structure did not even converge to a stable structure despite all the efforts made.

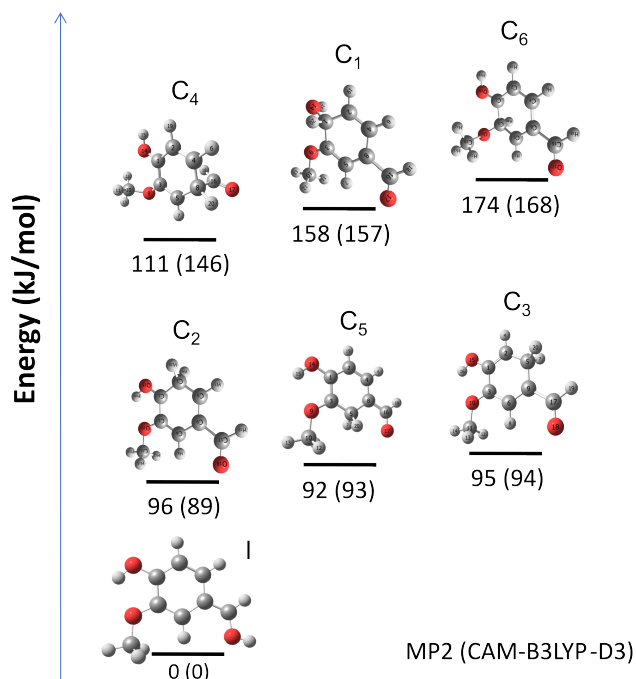

Figure S.2 Relative theoretical energies (kJ/mol) in the ground electronic state for the different vanillin isomers protonated on carbons from the aromatic ring w.r.t. the lowest energy isomer  $O_{1'}$  (see carbon atoms numbering in Figure 1 of main document). Values determined at MP2 and CAM-B3LYP (in parentheses) levels with an aug-cc-pVDZ basis set.

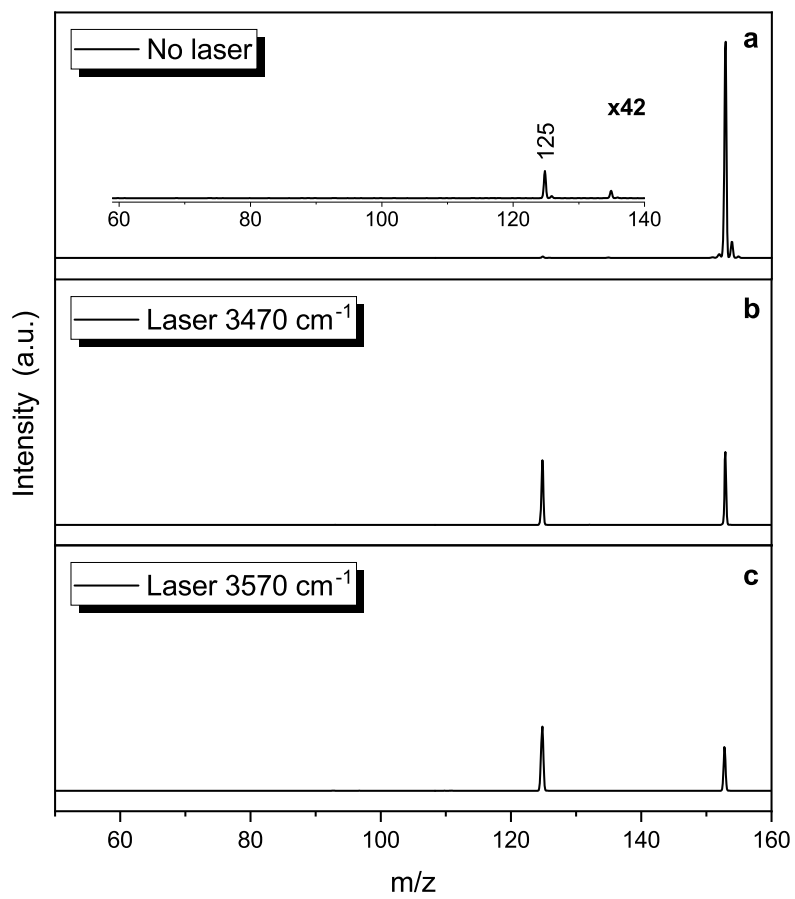

Figure S.3 Mass spectra of protonated vanillin under different conditions: (a) isolated vanillin with very low fragmentation energy in the ion trap; IRMPD experiments with IR laser irradiation wavelengths at (b)  $3470\text{ cm}^{-1}$  and (c)  $3570\text{ cm}^{-1}$ . These data were acquired with the room temperature IRMPD setup at ILM, Lyon. For more details, check the "Methods" section in the main manuscript and references? ?

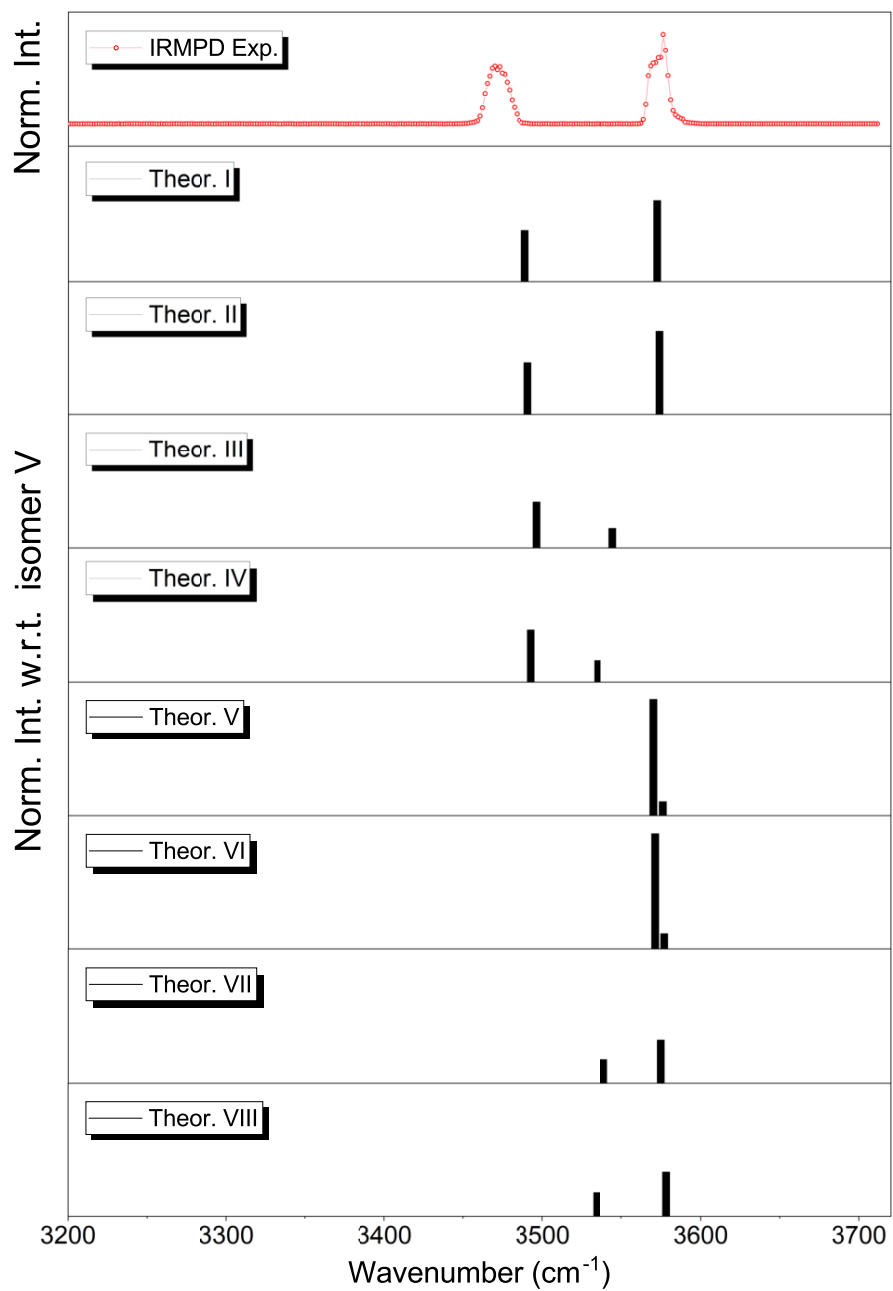

Figure S.4 Comparison of experimental IRMPD spectrum and theoretical infrared spectrum within the harmonic approximation for conformers of vanillin protonated on the oxygen of the carbonyl group. A scaling factor of 0.942 has been applied to theoretical frequencies.

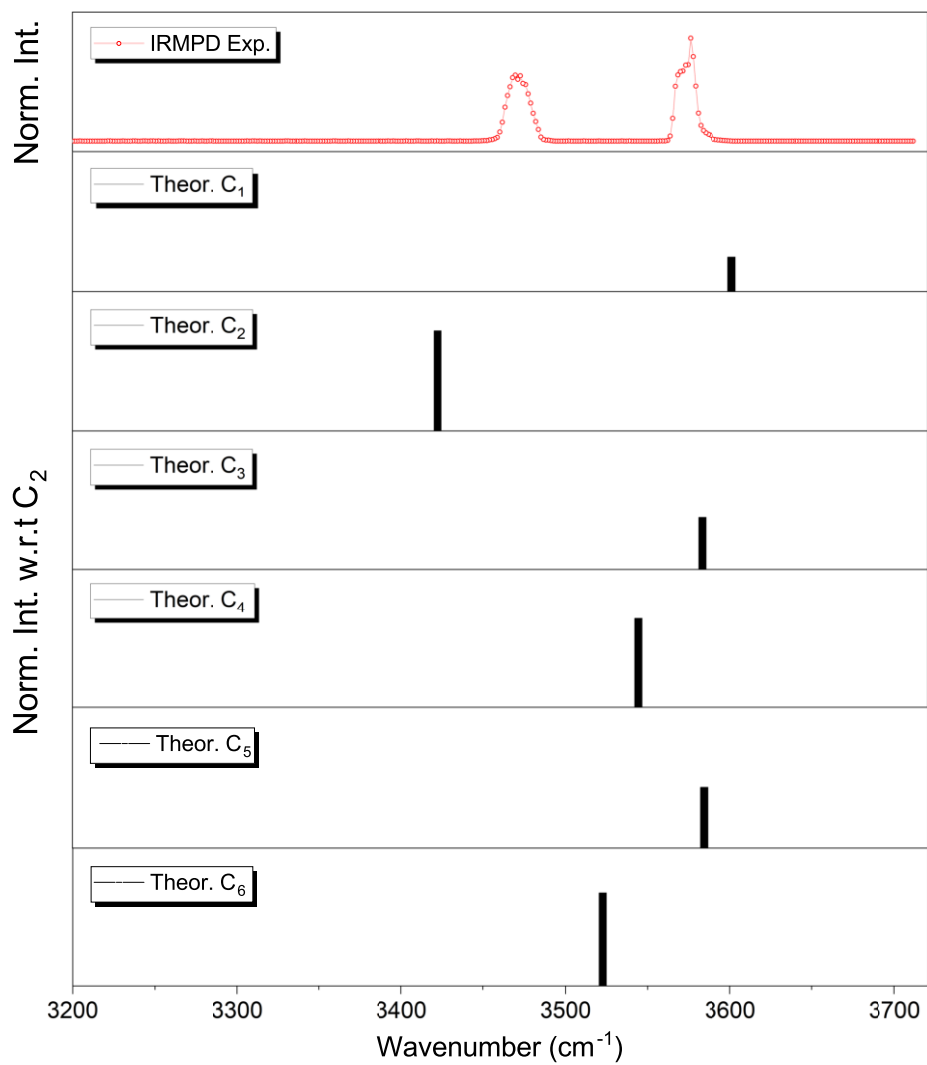

Figure S.5 Comparison of experimental IRMPD spectrum and theoretical infrared spectrum within the harmonic approximation for isomers of protonated vanillin on the aromatic ring. A scaling factor of 0.942 has been applied to theoretical frequencies.

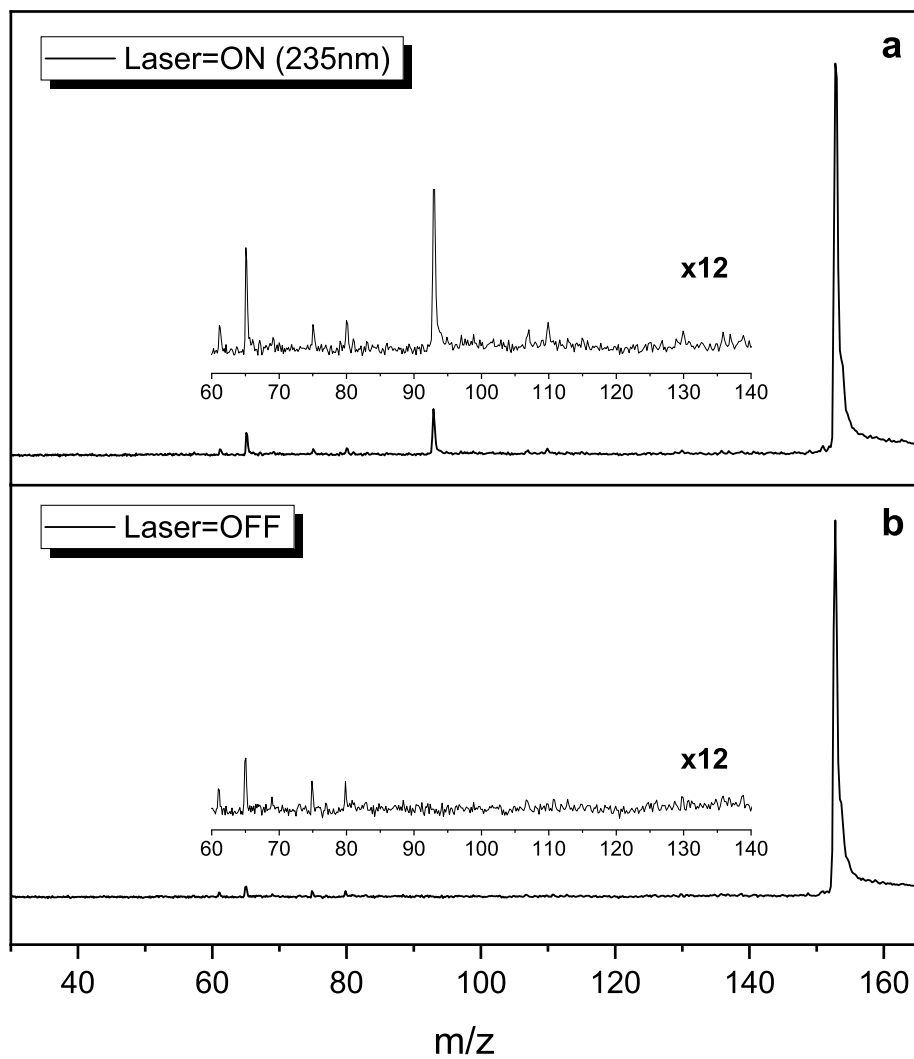

Figure S.6 Time-of-flight (TOF) of protonated vanillin corresponding to the UVPD experiment. The production of ions by UV photoexcitation at 235 nm can be observed by comparison of panels (a) Laser ON and (b) Laser OFF. Mass filters are applied before the ion trap with a mass-gate and inside the ion trap in the form of an additional radiofrequency. Both panels have the same ordinate scale. The  $m/z=125$  corresponding to CO does not appear at this particular irradiation wavelength (235 nm).

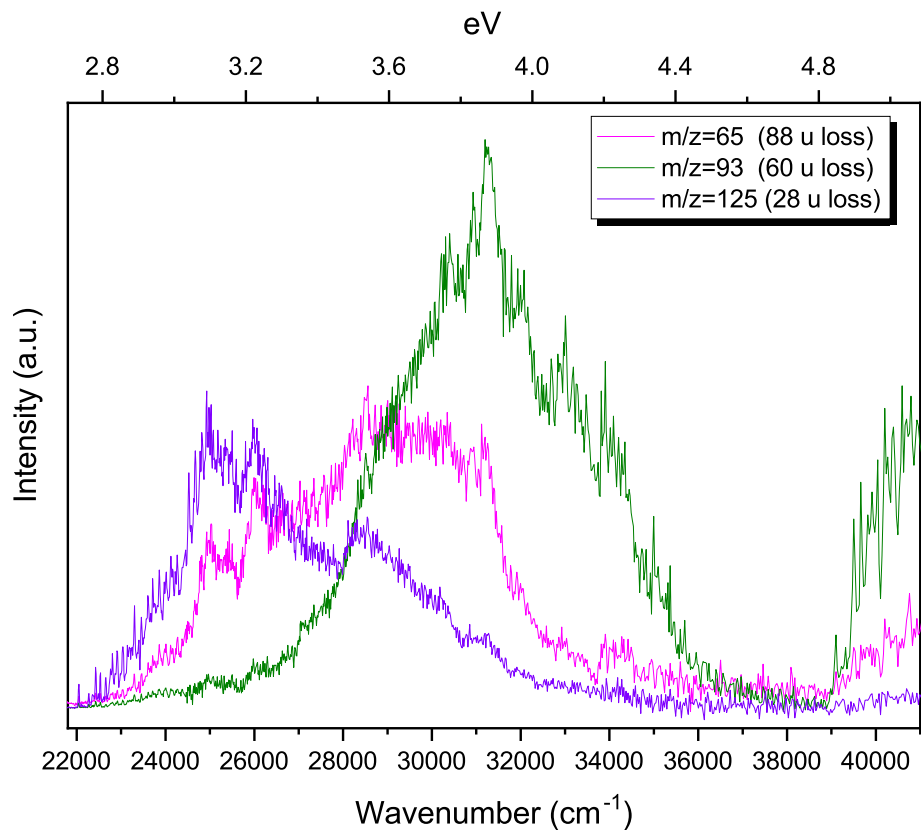

Figure S.7 Photofragmentation spectrum of protonated vanillin recorded at the most intense  $m/z$  ratios. The corresponding mass losses with respect to the protonated molecule ( $m/z=153$ ) are given in the legend.

### Vanillin Isom. $O_1$ (II)

Excitation energies and oscillator strengths:

|                                                                                   |            |           |           |          |              |
|-----------------------------------------------------------------------------------|------------|-----------|-----------|----------|--------------|
| Excited State 1:                                                                  | Singlet-A' | 3.4480 eV | 359.58 nm | f=0.1052 | <S**2>=0.000 |
| 39 -> 41                                                                          |            | 0.30315   |           |          |              |
| 40 -> 41                                                                          |            | 0.63617   |           |          |              |
| This state for optimization and/or second-order correction.                       |            |           |           |          |              |
| Total Energy, E(TD-HF/TD-DFT) = -535.373484242                                    |            |           |           |          |              |
| Copying the excited state density for this state as the 1-particle RhoCI density. |            |           |           |          |              |
| Excited State 2:                                                                  | Singlet-A' | 4.2950 eV | 288.67 nm | f=0.3898 | <S**2>=0.000 |
| 39 -> 41                                                                          |            | 0.61885   |           |          |              |
| 40 -> 41                                                                          |            | -0.29974  |           |          |              |
| 40 -> 42                                                                          |            | -0.13533  |           |          |              |
| Excited State 3:                                                                  | Singlet-A' | 5.7962 eV | 213.91 nm | f=0.1801 | <S**2>=0.000 |
| 39 -> 41                                                                          |            | 0.12848   |           |          |              |
| 39 -> 46                                                                          |            | -0.13529  |           |          |              |
| 40 -> 42                                                                          |            | 0.66948   |           |          |              |

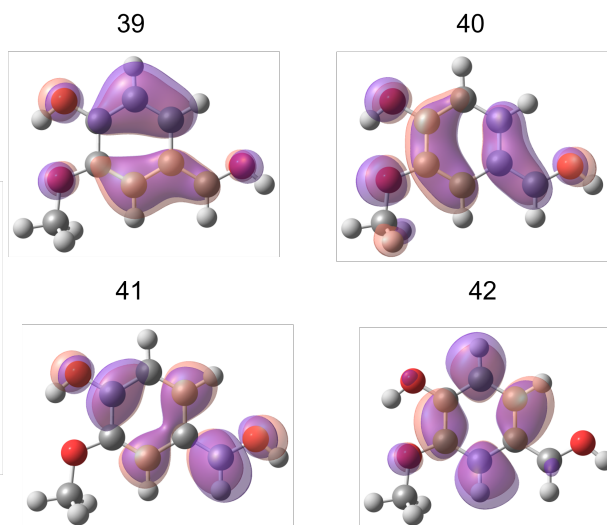

Figure S.8 Molecular orbitals involved in the three first singlet-singlet transitions for the most stable isomer  $O_1$  of protonated vanillin.

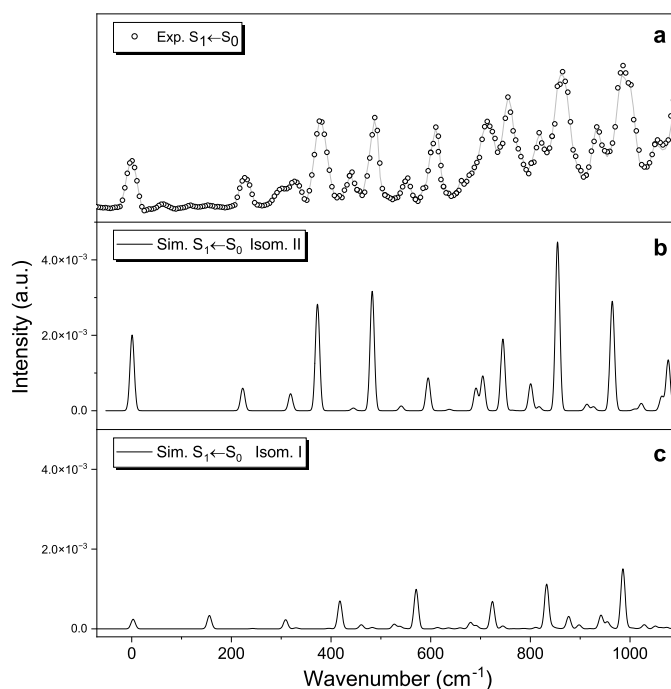

Figure S.9 Origin of the  $S_1 \leftarrow S_0$  transition for protonated vanillin. Comparison between (b) Experimental spectrum, and vibronic theoretical transitions (FC factors) simulated with Pgopher for (a) Isomer II and (c) Isomer I. Same graphics as in Figure ??, but using the same scale in panels b and c, to highlight the difference in FC factor for Isomers I and II.

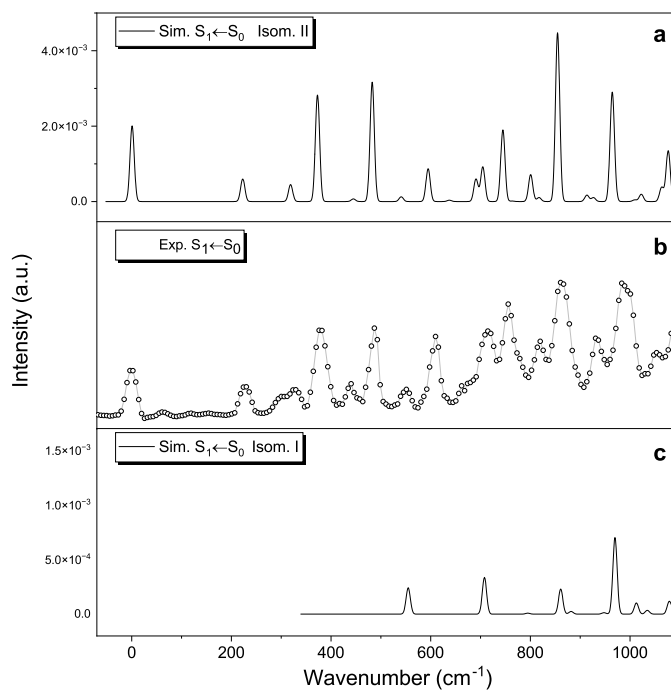

Figure S.10 Origin of the  $S_1 \leftarrow S_0$  transition for protonated vanillin. Comparison between (b) Experimental spectrum, and vibronic theoretical transitions (FC factors) simulated with Pgopher for (a) Isomer II and (c) Isomer I. The experimental 0-0 is placed at  $22048 \text{ cm}^{-1}$  (2.7 eV). The vibronic theoretical transition for isomer I has been shifted  $552 \text{ cm}^{-1}$ , in agreement with the difference in  $S_1 \leftarrow S_0$  adiabatic excitation energy for isomers I and II. Frequency calculations were performed at the CC2/cc-pVDZ theory level.



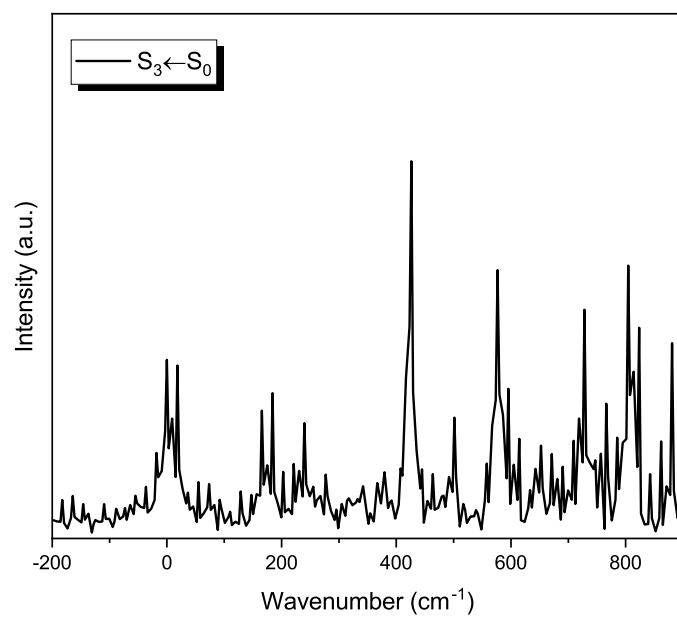

Figure S.11 Origin of the  $S_3 \leftarrow S_0$  transition for protonated vanillin. A baseline correction has been applied.

Table S.1 Ground state energies and excitation energies (AEE: adiabatic, VEE: vertical) for the different isomers of protonated vanillin computed at the CAM-B3LYP/aug-cc-pVDZ level. All the energy values are in eV and are scaled with respect to the ground state of the O<sub>1'</sub>(I) isomer. Values in italics and parentheses correspond to the oscillator strength of the transition. Only vertical excitations in the 3-6 eV range with non-zero oscillator strength are shown.

|                        |              | CAM-B3LYP-D3/aug-cc-pVDZ        |                                 |                                 |                                 |                                 |                                 |                                 |
|------------------------|--------------|---------------------------------|---------------------------------|---------------------------------|---------------------------------|---------------------------------|---------------------------------|---------------------------------|
|                        | Ground state | AEE                             | VEE                             |                                 |                                 |                                 |                                 |                                 |
| O <sub>1'</sub> (I)    | 0            | 3.06                            | 3.55 (0.094)                    | 4.24 (0.414)                    | 5.90 (0.134)                    |                                 |                                 |                                 |
|                        |              | S <sub>1</sub> ← S <sub>0</sub> | S <sub>1</sub> ← S <sub>0</sub> | S <sub>2</sub> ← S <sub>0</sub> | S <sub>3</sub> ← S <sub>0</sub> |                                 |                                 |                                 |
| O <sub>1'</sub> (II)   | 0.05         | 2.99                            | 3.45 (0.105)                    | 4.30 (0.390)                    | 5.80 (0.180)                    |                                 |                                 |                                 |
|                        |              | S <sub>1</sub> ← S <sub>0</sub> | S <sub>1</sub> ← S <sub>0</sub> | S <sub>2</sub> ← S <sub>0</sub> | S <sub>3</sub> ← S <sub>0</sub> |                                 |                                 |                                 |
| O <sub>1'</sub> (III)  | 0.13         |                                 | 3.69 (0.121)                    | 4.27 (0.363)                    | 5.87 (0.136)                    |                                 |                                 |                                 |
|                        |              |                                 | S <sub>1</sub> ← S <sub>0</sub> | S <sub>2</sub> ← S <sub>0</sub> | S <sub>3</sub> ← S <sub>0</sub> |                                 |                                 |                                 |
| O <sub>1'</sub> (IV)   | 0.15         |                                 | 3.49 (0.111)                    | 4.34 (0.347)                    | 5.75 (0.227)                    |                                 |                                 |                                 |
|                        |              |                                 | S <sub>1</sub> ← S <sub>0</sub> | S <sub>2</sub> ← S <sub>0</sub> | S <sub>3</sub> ← S <sub>0</sub> |                                 |                                 |                                 |
| O <sub>1'</sub> (V)    | 0.21         |                                 | 3.30 (0.090)                    | 4.27 (0.397)                    | 5.76 (0.178)                    |                                 |                                 |                                 |
|                        |              |                                 | S <sub>1</sub> ← S <sub>0</sub> | S <sub>2</sub> ← S <sub>0</sub> | S <sub>3</sub> ← S <sub>0</sub> |                                 |                                 |                                 |
| O <sub>1'</sub> (VI)   | 0.26         |                                 | 3.20 (0.092)                    | 4.32 (0.370)                    | 5.63 (0.210)                    |                                 |                                 |                                 |
|                        |              |                                 | S <sub>1</sub> ← S <sub>0</sub> | S <sub>2</sub> ← S <sub>0</sub> | S <sub>3</sub> ← S <sub>0</sub> |                                 |                                 |                                 |
| O <sub>1'</sub> (VII)  | 0.33         |                                 | 3.46 (0.111)                    | 4.31 (0.354)                    | 5.75 (0.179)                    |                                 |                                 |                                 |
|                        |              |                                 | S <sub>1</sub> ← S <sub>0</sub> | S <sub>2</sub> ← S <sub>0</sub> | S <sub>3</sub> ← S <sub>0</sub> |                                 |                                 |                                 |
| O <sub>1'</sub> (VIII) | 0.37         |                                 | 3.25 (0.094)                    | 4.36 (0.329)                    | 5.59 (0.265)                    |                                 |                                 |                                 |
|                        |              |                                 | S <sub>1</sub> ← S <sub>0</sub> | S <sub>2</sub> ← S <sub>0</sub> | S <sub>3</sub> ← S <sub>0</sub> |                                 |                                 |                                 |
| C <sub>1</sub>         | 1.63         |                                 | 3.38 (0.103)                    | 4.28 (0.046)                    | 5.03 (0.033)                    | 5.53 (0.053)                    | 5.71 (0.103)                    | 5.96 (0.020)                    |
|                        |              |                                 | S <sub>2</sub> ← S <sub>0</sub> | S <sub>3</sub> ← S <sub>0</sub> | S <sub>4</sub> ← S <sub>0</sub> | S <sub>5</sub> ← S <sub>0</sub> | S <sub>6</sub> ← S <sub>0</sub> | S <sub>7</sub> ← S <sub>0</sub> |
| C <sub>2</sub>         | 0.93         |                                 | 3.35 (0.122)                    | 5.09 (0.001)                    | 5.61 (0.170)                    |                                 |                                 |                                 |
|                        |              |                                 | S <sub>1</sub> ← S <sub>0</sub> | S <sub>4</sub> ← S <sub>0</sub> | S <sub>5</sub> ← S <sub>0</sub> |                                 |                                 |                                 |
| C <sub>3</sub>         | 0.98         |                                 | 3.55 (0.129)                    | 4.87 (0.142)                    | 5.75 (0.444)                    |                                 |                                 |                                 |
|                        |              |                                 | S <sub>2</sub> ← S <sub>0</sub> | S <sub>3</sub> ← S <sub>0</sub> | S <sub>6</sub> ← S <sub>0</sub> |                                 |                                 |                                 |
| C <sub>4</sub>         | 1.51         |                                 | 3.57 (0.069)                    | 4.17 (0.047)                    | 4.39 (0.076)                    | 4.83 (0.022)                    | 5.37 (0.058)                    | 5.67 (0.228)                    |
|                        |              |                                 | S <sub>1</sub> ← S <sub>0</sub> | S <sub>2</sub> ← S <sub>0</sub> | S <sub>3</sub> ← S <sub>0</sub> | S <sub>4</sub> ← S <sub>0</sub> | S <sub>5</sub> ← S <sub>0</sub> | S <sub>6</sub> ← S <sub>0</sub> |
| C <sub>5</sub>         | 0.96         |                                 | 3.16 (0.171)                    | 5.18 (0.007)                    | 5.81 (0.432)                    |                                 |                                 |                                 |
|                        |              |                                 | S <sub>2</sub> ← S <sub>0</sub> | S <sub>4</sub> ← S <sub>0</sub> | S <sub>6</sub> ← S <sub>0</sub> |                                 |                                 |                                 |
| C <sub>6</sub>         | 1.75         |                                 | 3.51 (0.022)                    | 3.84 (0.063)                    | 3.92 (0.013)                    | 4.93 (0.008)                    | 5.70 (0.043)                    |                                 |
|                        |              |                                 | S <sub>2</sub> ← S <sub>0</sub> | S <sub>3</sub> ← S <sub>0</sub> | S <sub>4</sub> ← S <sub>0</sub> | S <sub>5</sub> ← S <sub>0</sub> | S <sub>6</sub> ← S <sub>0</sub> |                                 |
| Benzaldehyde           | -            | 3.08                            | 3.50 (0.029)                    |                                 |                                 |                                 |                                 |                                 |

Table S.2 Optimised structure (Cartesian coordinates) in the ground state ( $S_0$ ) for isomer II at the CAM-B3LYP/aug-cc-pVDZ level of theory.

|   | $x$             | $y$             | $z$             |
|---|-----------------|-----------------|-----------------|
| C | -0.831910000000 | -1.340053000000 | 0.000000000000  |
| C | 0.471836000000  | -1.869519000000 | 0.000000000000  |
| C | -1.066485000000 | 0.070407000000  | 0.000000000000  |
| H | 0.590216000000  | -2.950769000000 | 0.000000000000  |
| C | 1.541185000000  | -1.015821000000 | 0.000000000000  |
| C | 0.000000000000  | 0.925849000000  | 0.000000000000  |
| H | 2.557163000000  | -1.405113000000 | 0.000000000000  |
| H | -0.148101000000 | 2.003291000000  | 0.000000000000  |
| C | 1.329707000000  | 0.393773000000  | 0.000000000000  |
| O | -2.376193000000 | 0.383130000000  | 0.000000000000  |
| C | -2.747197000000 | 1.764914000000  | 0.000000000000  |
| H | -2.367347000000 | 2.260338000000  | 0.903434000000  |
| H | -2.367347000000 | 2.260338000000  | -0.903434000000 |
| H | -3.838386000000 | 1.780817000000  | 0.000000000000  |
| O | -1.851995000000 | -2.167249000000 | 0.000000000000  |
| H | -2.688760000000 | -1.668692000000 | 0.000000000000  |
| C | 2.394060000000  | 1.275994000000  | 0.000000000000  |
| O | 3.629786000000  | 0.853518000000  | 0.000000000000  |
| H | 2.225498000000  | 2.357122000000  | 0.000000000000  |
| H | 4.277098000000  | 1.574210000000  | 0.000000000000  |

Table S.3 Optimised structure (Cartesian coordinates) in the first singlet state ( $S_1$ ) for isomer II at the CAM-B3LYP/aug-cc-pVDZ level of theory.

|   | $x$             | $y$             | $z$             |
|---|-----------------|-----------------|-----------------|
| C | -0.877010000000 | -1.403550000000 | 0.000000000000  |
| C | 0.420094000000  | -1.854922000000 | 0.000000000000  |
| C | -1.080940000000 | 0.016574000000  | 0.000001000000  |
| H | 0.598684000000  | -2.928782000000 | -0.000003000000 |
| C | 1.509972000000  | -0.957088000000 | 0.000007000000  |
| C | 0.026604000000  | 0.922108000000  | 0.000002000000  |
| H | 2.521101000000  | -1.360971000000 | 0.000007000000  |
| H | -0.167270000000 | 1.992729000000  | 0.000001000000  |
| C | 1.335372000000  | 0.437538000000  | 0.000010000000  |
| O | -2.336426000000 | 0.399004000000  | -0.000002000000 |
| C | -2.727228000000 | 1.791019000000  | 0.000000000000  |
| H | -2.350587000000 | 2.277565000000  | 0.906558000000  |
| H | -2.350585000000 | 2.277569000000  | -0.906554000000 |
| H | -3.817568000000 | 1.777655000000  | -0.000001000000 |
| O | -1.905855000000 | -2.262125000000 | -0.000005000000 |
| H | -2.758001000000 | -1.805591000000 | -0.000005000000 |
| C | 2.421852000000  | 1.360377000000  | -0.000001000000 |
| O | 3.648164000000  | 0.843235000000  | -0.000002000000 |
| H | 2.289116000000  | 2.439487000000  | -0.000006000000 |
| H | 4.333341000000  | 1.524656000000  | -0.000009000000 |

Table S.4 Optimised structure (Cartesian coordinates) in the second singlet state ( $S_2$ ) for isomer II at the CAM-B3LYP/aug-cc-pVDZ level of theory.

|   | $x$             | $y$             | $z$             |
|---|-----------------|-----------------|-----------------|
| C | -0.863973000000 | -1.342837000000 | 0.000001000000  |
| C | 0.461965000000  | -1.853176000000 | -0.000002000000 |
| C | -1.092742000000 | 0.063974000000  | 0.000002000000  |
| H | 0.597256000000  | -2.933601000000 | -0.000002000000 |
| C | 1.565013000000  | -0.968756000000 | -0.000003000000 |
| C | -0.024009000000 | 0.924521000000  | 0.000002000000  |
| H | 2.577506000000  | -1.362808000000 | -0.000005000000 |
| H | -0.177414000000 | 2.001317000000  | 0.000003000000  |
| C | 1.329864000000  | 0.410657000000  | -0.000002000000 |
| O | -2.398254000000 | 0.381092000000  | 0.000000000000  |
| C | -2.768868000000 | 1.764215000000  | -0.000002000000 |
| H | -2.386970000000 | 2.258166000000  | 0.903208000000  |
| H | -2.386970000000 | 2.258164000000  | -0.903213000000 |
| H | -3.859999000000 | 1.779581000000  | -0.000003000000 |
| O | -1.868191000000 | -2.203059000000 | 0.000003000000  |
| H | -2.718252000000 | -1.725200000000 | 0.000006000000  |
| C | 2.438830000000  | 1.321457000000  | 0.000000000000  |
| O | 3.653067000000  | 0.813745000000  | -0.000001000000 |
| H | 2.310237000000  | 2.405538000000  | 0.000005000000  |
| H | 4.344733000000  | 1.493493000000  | 0.000002000000  |

Table S.5 Optimised structure (Cartesian coordinates) in the third singlet state ( $S_3$ ) for isomer II at the CAM-B3LYP/aug-cc-pVDZ level of theory.

|   | $x$             | $y$             | $z$             |
|---|-----------------|-----------------|-----------------|
| C | -1.040313000000 | -1.226118000000 | -0.076370000000 |
| C | 0.173772000000  | -1.989324000000 | -0.165550000000 |
| C | -1.056405000000 | 0.195804000000  | -0.169164000000 |
| H | 0.127894000000  | -3.072384000000 | -0.201495000000 |
| C | 1.352507000000  | -1.256987000000 | -0.075411000000 |
| C | 0.167442000000  | 0.915954000000  | -0.409156000000 |
| H | 2.303485000000  | -1.764925000000 | 0.080831000000  |
| H | 0.193111000000  | 1.923660000000  | -0.822014000000 |
| C | 1.346641000000  | 0.160018000000  | -0.182483000000 |
| O | -2.207994000000 | 0.759886000000  | 0.214656000000  |
| C | -2.388880000000 | 2.183489000000  | 0.097514000000  |
| H | -1.664712000000 | 2.709221000000  | 0.729568000000  |
| H | -2.282195000000 | 2.480389000000  | -0.953421000000 |
| H | -3.404870000000 | 2.375918000000  | 0.445510000000  |
| O | -2.139393000000 | -1.882386000000 | 0.209440000000  |
| H | -2.898949000000 | -1.278034000000 | 0.306780000000  |
| C | 2.524152000000  | 0.936659000000  | -0.032315000000 |
| O | 3.631074000000  | 0.383217000000  | 0.360732000000  |
| H | 2.514269000000  | 2.012840000000  | -0.225031000000 |
| H | 4.368972000000  | 1.010599000000  | 0.438257000000  |

Table S.6 Ground and excited state normal modes (in  $\text{cm}^{-1}$ ) of the  $\text{O}_1'$  (II) isomer of protonated vanillin calculated at the DFT-TDDFT level with the CAM-B3LYP/aug-cc-pVDZ and the CC2/cc-pVDZ levels of theory. The excited state normal mode assignment follows the correspondence with the ground state normal modes in each method.

| Symmetry    | Mode | $S_0$ DFT | $S_1$ TD-DFT | $S_0$ CC2 | $S_1$ CC2 | Symmetry         | Mode | $S_0$ DFT | $S_1$ TD-DFT | $S_0$ CC2 | $S_1$ CC2 |
|-------------|------|-----------|--------------|-----------|-----------|------------------|------|-----------|--------------|-----------|-----------|
| a' in plane | 1    | 3794      | 3828         | 3768      | 3735      | a'' out-of-plane | 37   | 3139      | 3177         | 3191      | 3230      |
|             | 2    | 3706      | 3817         | 3678      | 3731      |                  | 38   | 1485      | 1483         | 1494      | 1487      |
|             | 3    | 3247      | 3239         | 3266      | 3247      |                  | 38   | 1485      | 1483         | 1494      | 1487      |
|             | 4    | 3234      | 3236         | 3252      | 3236      |                  | 39   | 1172      | 1152         | 1177      | 1132      |
|             | 5    | 3233.5    | 3229         | 3251      | 3226      |                  | 40   | 1034      | 1011         | 1004      | 395       |
|             | 6    | 3208      | 3226         | 3248      | 3265      |                  | 41   | 1021      | 604          | 965       | 940       |
|             | 7    | 3181      | 3242         | 3202      | 3212      |                  | 42   | 903       | 887          | 850       | 893       |
|             | 8    | 3055      | 3078         | 3086      | 3103      |                  | 43   | 879       | 913          | 810       | 786       |
|             | 9    | 1684      | 1547         | 1708      | 1524      |                  | 44   | 793       | 697          | 672       | 858       |
|             | 10   | 1671      | 1595         | 1676      | 1680      |                  | 45   | 670       | 548          | 639       | 603       |
|             | 11   | 1631      | 1694         | 1627      | 1593      |                  | 46   | 646       | 604          | 630       | 539       |
|             | 12   | 1578      | 1509         | 1605      | 1497      |                  | 47   | 573       | 468          | 534       | 474       |
|             | 13   | 1509      | 1483         | 1543      | 1395      |                  | 48   | 468       | 432          | 453       | 424       |
|             | 14   | 1482      | 1458         | 1502      | 1477      |                  | 49   | 343       | 337          | 328       | 305       |
|             | 15   | 1473      | 1433         | 1482      | 1418      |                  | 50   | 316       | 256          | 296       | 218       |
|             | 16   | 1462      | 1406         | 1472      | 1450      |                  | 51   | 253       | 198          | 241       | 173       |
|             | 17   | 1396      | 1343         | 1403      | 1335      |                  | 52   | 163       | 163          | 155       | 156       |
|             | 18   | 1359      | 1341         | 1359      | 1290      |                  | 53   | 103       | 100          | 99        | 68        |
|             | 19   | 1346      | 1306         | 1351      | 1299      |                  | 54   | 98        | 104          | 96        | 100       |
|             | 20   | 1326      | 1285         | 1339      | 1242      |                  |      |           |              |           |           |
|             | 21   | 1257      | 1232         | 1251      | 1203      |                  |      |           |              |           |           |
|             | 22   | 1229      | 1207         | 1229      | 1199      |                  |      |           |              |           |           |
|             | 23   | 1218      | 1163         | 1223      | 1173      |                  |      |           |              |           |           |
|             | 24   | 1199      | 1193         | 1198      | 1102      |                  |      |           |              |           |           |
|             | 25   | 1161      | 1134         | 1145      | 1122      |                  |      |           |              |           |           |
|             | 26   | 1053      | 1023         | 1045      | 974       |                  |      |           |              |           |           |
|             | 27   | 956       | 947          | 949       | 894       |                  |      |           |              |           |           |
|             | 28   | 832       | 805          | 818       | 774       |                  |      |           |              |           |           |
|             | 29   | 769       | 755          | 767       | 721       |                  |      |           |              |           |           |
|             | 30   | 632       | 618          | 622       | 595       |                  |      |           |              |           |           |
|             | 31   | 558       | 557          | 553       | 545       |                  |      |           |              |           |           |
|             | 32   | 518       | 504          | 512       | 482       |                  |      |           |              |           |           |
|             | 33   | 410       | 390          | 400       | 372       |                  |      |           |              |           |           |
|             | 34   | 344       | 334          | 339       | 318       |                  |      |           |              |           |           |
|             | 35   | 246       | 237          | 238       | 222       |                  |      |           |              |           |           |
|             | 36   | 172       | 170          | 165       | 158       |                  |      |           |              |           |           |
